# Supplementary material for: Achieving high energy storage in BaTiO3/rGO/PVDF nanocomposites by regulating the charge transfer path at the hetero-interface
Source: Royal Society of Chemistry journal article supplement (doi:10.1039/d2ta08303e), 2023-01-01
Supplement: d2ta08303e1.pdf [file d2ta08303e1.pdf]

## Supporting Information

**Achieving high energy storage in BaTiO<sub>3</sub>/rGO/PVDF nanocomposites by  
regulating the charge transfer path at the hetero-interface**

*Yange Yu, Wenzhu Shao\*, Yue Liu, Yang Li, Jing Zhong, Huijian Ye, Liang Zhen\**

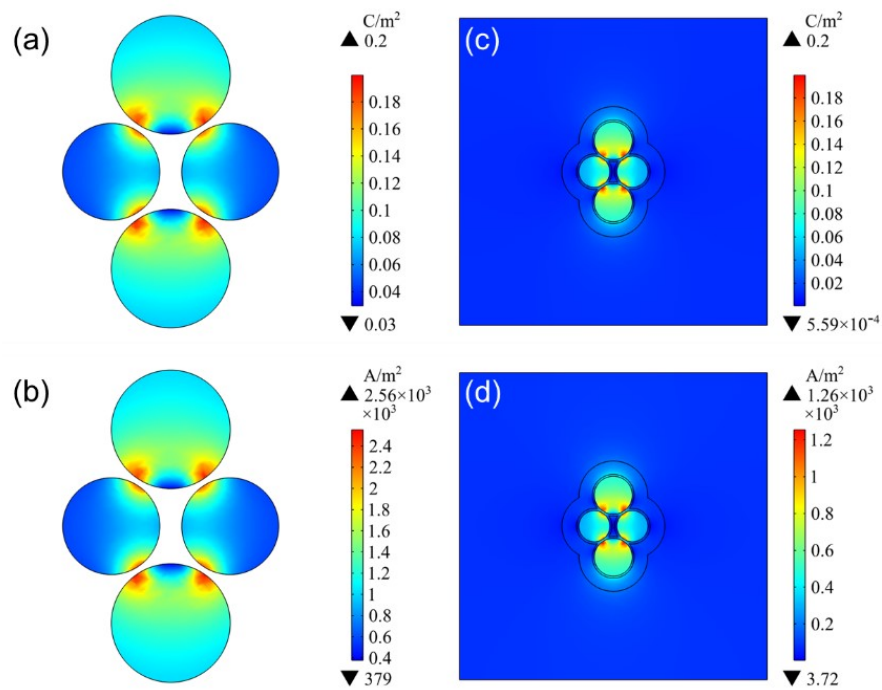

**Figure S1.** The simulated results of BTO/PVDF nanocomposite: (a) the polarization and (b) current density of BTO NPs, (c) the polarization and (d) current density of BTO NPs in PVDF matrix.

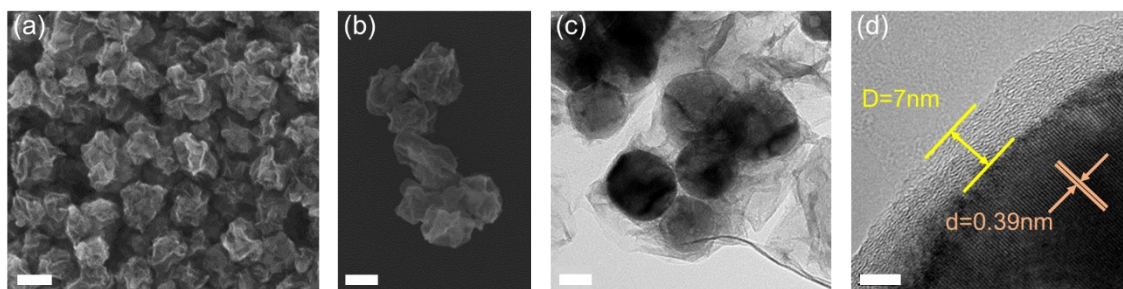

**Figure S2.** (a, b) SEM images of BTO@rGO NPs, scale bar: 200nm; (c) TEM image, scale bar: 50nm; (d) HRTEM image, scale bar: 5nm.

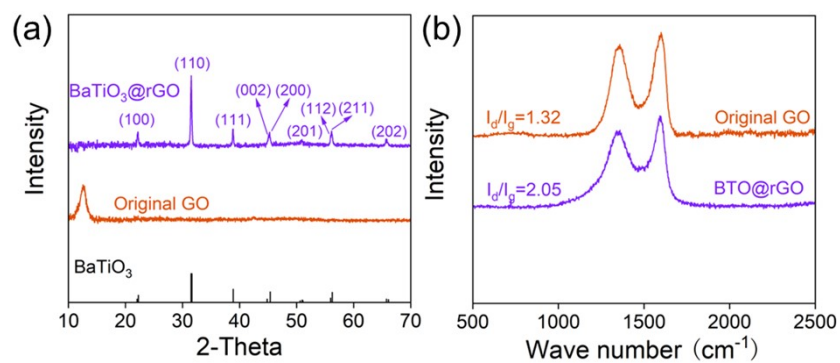

**Figure S3.** (a) XRD patterns, (b) Raman spectra of GO nanosheets and BTO@rGO NPs.

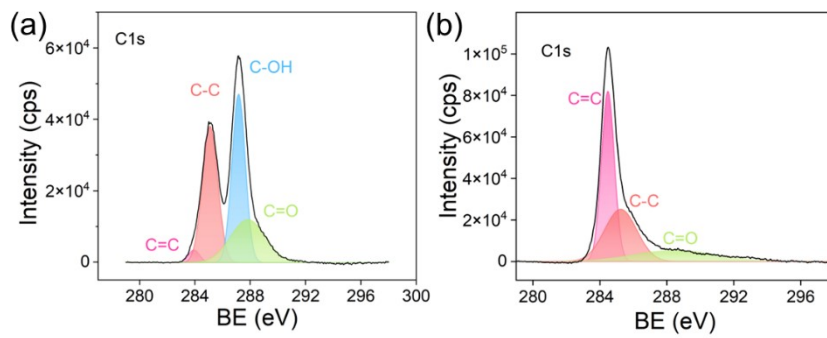

**Figure S4.** Typical high-resolution XPS spectra of C1s region of (a) GO nanosheets, (b) BTO@rGO NPs.

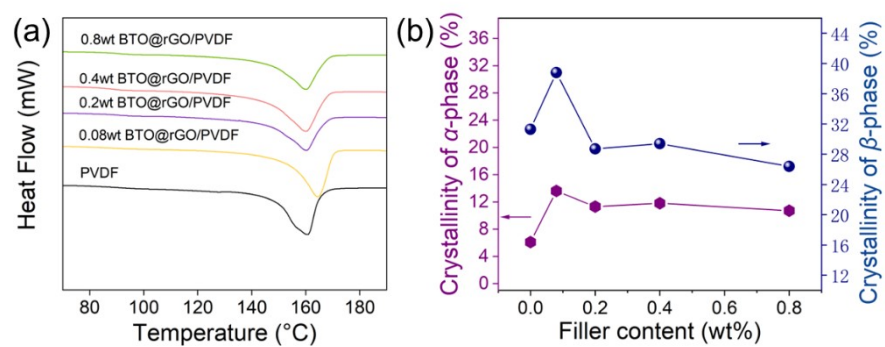

**Figure S5.** (a) DSC cruves of BTO@rGO/PVDF nanocomposites, (b) Comparison of crystallinity of  $\alpha$ -phase and  $\beta$ -phase.

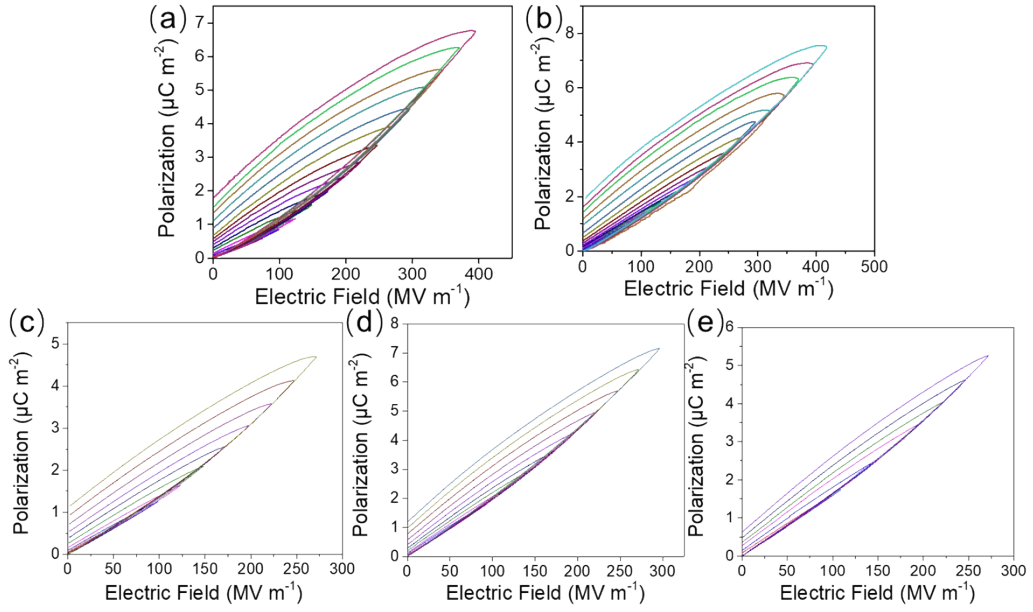

**Figure S6.** D-E loops of the BTO@rGO/PVDF nanocomposites with various loadings measured under different electric fields. (a) PVDF, (b) 0.08wt%, (c) 0.2wt%, (d) 0.4wt%, (e) 0.8wt%.

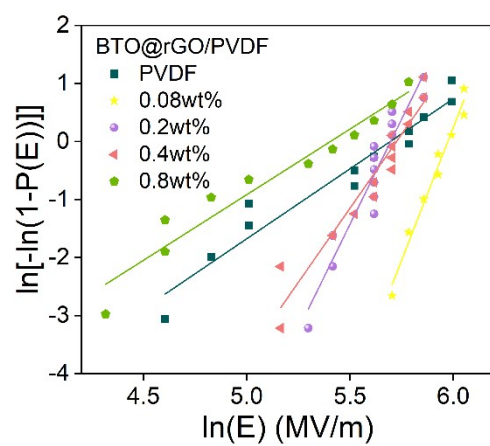

**Figure S7.** The Weibull distribution of BTO@rGO/PVDF nanocomposites.



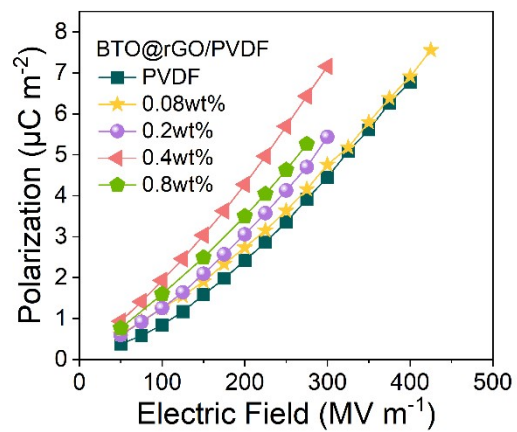

**Figure S8.** The polarization of BTO@rGO/PVDF nanocomposite with filler content varies.

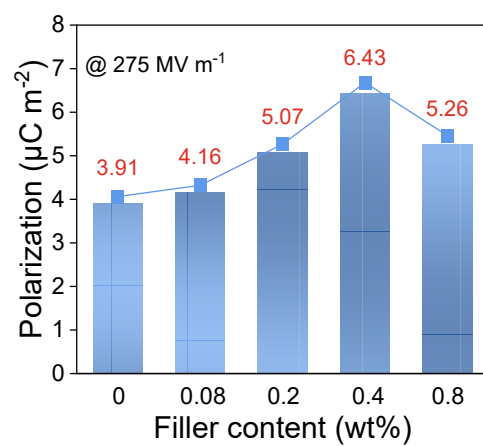

**Figure S9.** Polarization of BTO@rGO/PVDF nanocomposites varies by electric field and filler content.

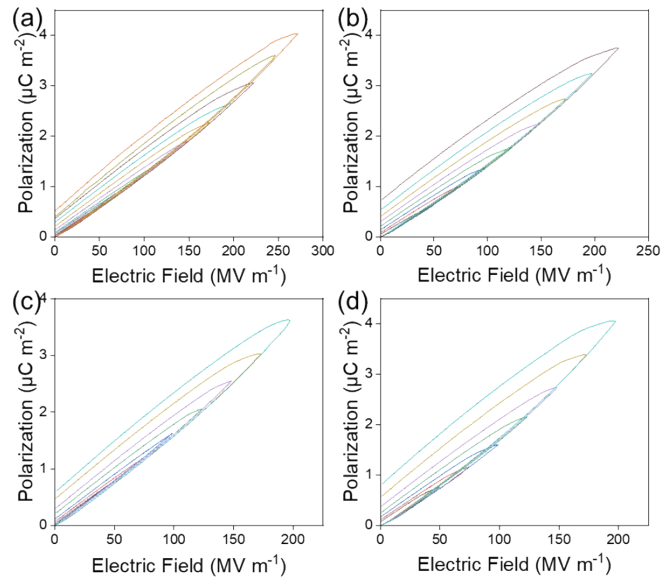

**Figure S10.** D-E loops of the BTO/PVDF nanocomposites with various loadings measured under different electric fields. (a) 0.08wt%, (b) 0.2wt%, (c) 0.4wt%, (d) 0.8wt%.

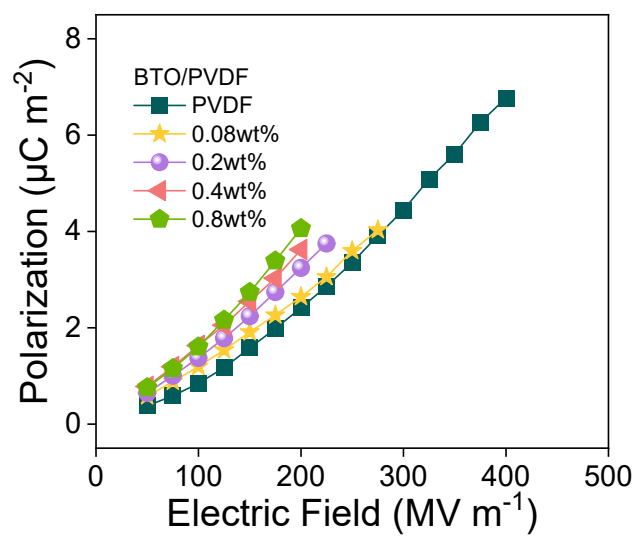

**Figure S11.** Polarization of BTO/PVDF nanocomposites varies by electric field with various filler contents.

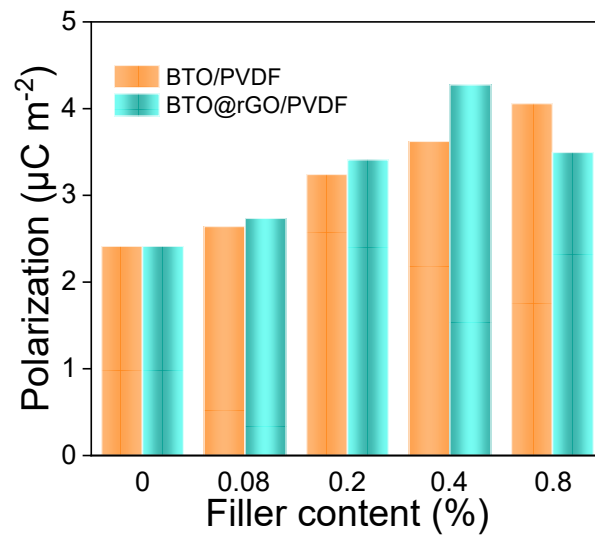

**Figure S12.** Comparison of polarization between BTO/PVDF and BTO@rGO/PVDF at  $200 \text{ MV m}^{-1}$ .

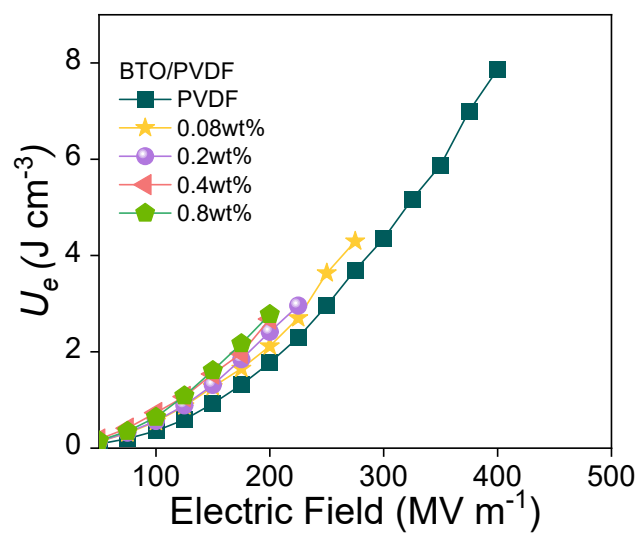

**Figure S13.** Polarization of BTO/PVDF nanocomposites varies by electric field with various filler contents.

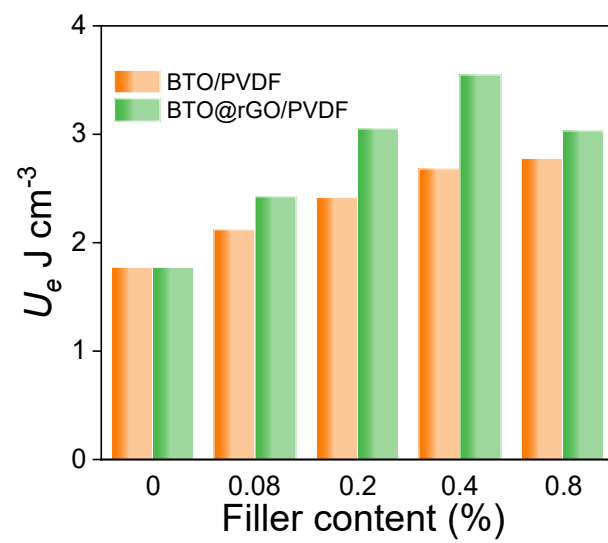

**Figure S14.** Comparison of  $U_e$  between BTO/PVDF and BTO@rGO/PVDF at 200 MV  $\text{m}^{-1}$ .

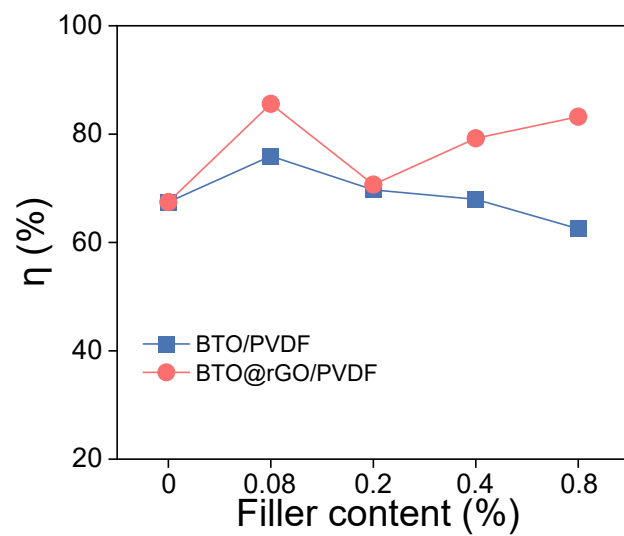

**Figure S15.** Comparison of  $\eta$  between BTO/PVDF and BTO@rGO/PVDF at 200 MV  $m^{-1}$ .



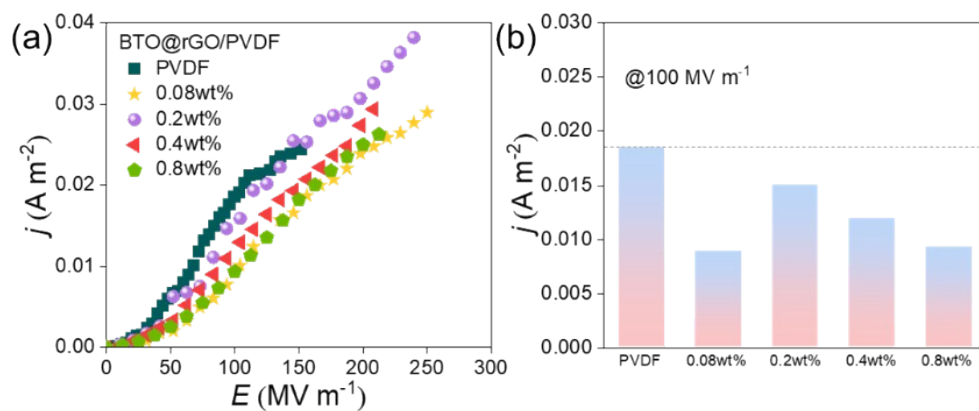

**Figure S16.** (a)  $j$ - $E$  curves of BTO@rGO/PVDF nanocomposites filled with various content of BTO@rGO nanoparticles (b) Variation of current density PVDF-based nanocomposite filled with various content of BTO@rGO NPs at 100 MV m<sup>-1</sup>.

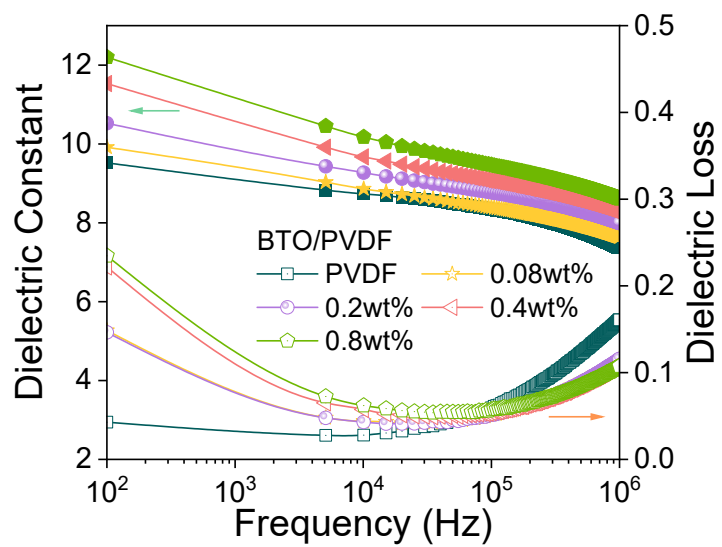

**Figure S17.** The frequency-dependence dielectric constant and dielectric loss of BTO/PVDF nanocomposites.

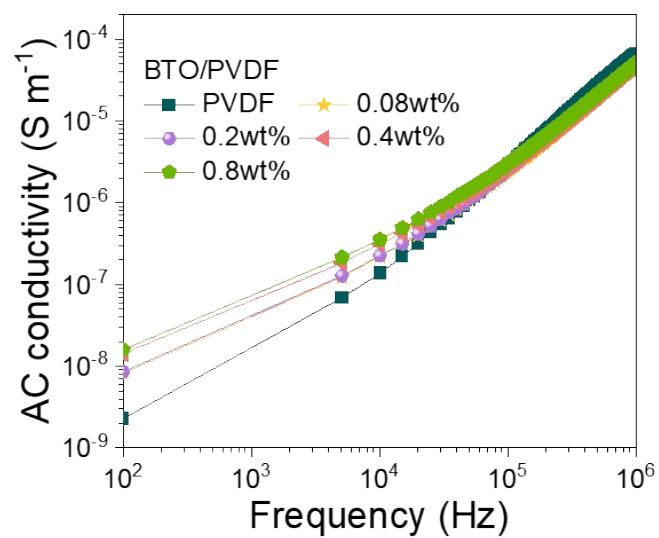

**Figure S18.** The frequency-dependent AC conductivity of BTO/PVDF nanocomposites.

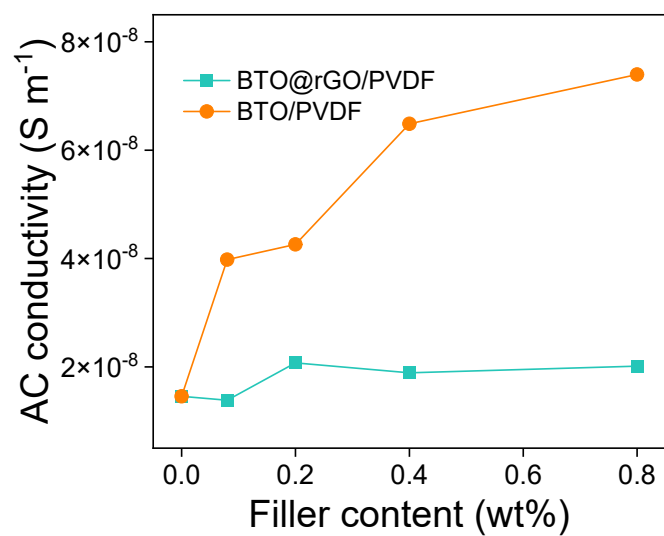

**Figure S19.** Comparison of AC conductivity versus BTO/PVDF and BTO@rGO/PVDF nanocomposites at 1kHz.

**Table S1.** The content of  $\beta$ -phase varies with the content of BTO@rGO nanoparticles

| Samples              | $F(\beta)$                | $F(\alpha)$                |
|----------------------|---------------------------|----------------------------|
|                      | $K_\beta=7.7 \times 10^4$ | $K_\alpha=6.1 \times 10^4$ |
| PVDF                 | 83.7%                     | 16.3%                      |
| 0.08wt% BTO@rGO/PVDF | 74.1%                     | 25.9%                      |
| 0.2wt% BTO@rGO/PVDF  | 71.7%                     | 28.3%                      |
| 0.4wt% BTO@rGO/PVDF  | 71.4%                     | 28.6%                      |
| 0.8wt% BTO@rGO/PVDF  | 71.3%                     | 28.7%                      |

**Table S2.** The crystallinity of  $\alpha$ -phase and  $\beta$ -phase varies with the content of BTO@rGO NPs

| Samples              | $X_c$ | $X_\alpha$ | $X_\beta$ |
|----------------------|-------|------------|-----------|
| PVDF                 | 37.4% | 6.1%       | 31.3%     |
| 0.08wt% BTO@rGO/PVDF | 52.4% | 13.6%      | 38.8%     |
| 0.2wt% BTO@rGO/PVDF  | 40.0% | 11.3%      | 28.7%     |
| 0.4wt% BTO@rGO/PVDF  | 41.2% | 11.8%      | 29.4%     |
| 0.8wt% BTO@rGO/PVDF  | 37.1% | 10.7%      | 26.4%     |

**Note 1 The calculation of the content of  $\beta$ -phase and  $\alpha$ -phase based on FTIR.**

The  $A_\alpha$  absorbance at  $766\text{ cm}^{-1}$  and  $A_\beta$  absorbance at  $840\text{ cm}^{-1}$  are given by the following equations under the assumption that IR absorption follows the Lambert-Beer law:

$$A_\alpha = \log \frac{I_\alpha^0}{I_\alpha} = K_\alpha C X_\alpha h \quad (1)$$

$$A_\beta = \log \frac{I_\beta^0}{I_\beta} = K_\beta C X_\beta h \quad (2)$$

$$F(\beta) = \frac{X_\beta}{X_\alpha + X_\beta} = \frac{A_\beta}{(K_\beta/K_\alpha)A_\alpha + A_\beta} \quad (3)$$

where  $h$  is the thickness of samples; and  $C$  represents the average total monomer concentration, which is a constant. The incident and transmitted intensity radiations were denoted by  $I^0$  and  $I$  respectively. The subscript represents the type of crystalline phase. The  $X$  with subscript represents the crystallinity of the specified phase. The values of  $K_\alpha$  and  $K_\beta$  were  $6.1 \times 10^4$  and  $7.7 \times 10^4\text{ cm}^2\text{ mol}^{-1}$  respectively, which respect the absorption coefficient at the respective wavenumber.

**Note 2 Finite Element Method (FEM) Modeling**

To explore the effect of the rGO layer on the polarization and current density in the PVDF matrix, the numerical simulation was performed by finite element method (FEM).and AC/DC module of COMSOL software. The model size was  $0.8\text{ }\mu\text{m} \times 0.8\text{ }\mu\text{m}$ , the core (BTO) diameter was  $80\text{ nm}$ , the shell (rGO) thickness was  $5\text{ nm}$ , and the transition zone thickness was  $35\text{ nm}$ . The periodic model of a single particle is analyzed by using a unitized extensible periodic model. The governing equation in the COMSOL model is:

$$\nabla \cdot (D) = \rho \quad (5)$$

$$\nabla \cdot j = \frac{-\partial \rho}{\partial t} \quad (5)$$

$$D = \varepsilon_0 \varepsilon_r E \quad (6)$$

$$E = -\nabla\varphi \quad (7)$$

where  $\sigma$  is the conductivity of the material,  $j$  is Current density,  $E$  is electric field,  $D$  is the electric displacement vector,  $\varepsilon_0$  represents the vacuum dielectric constant,  $\varepsilon_r$  represents the relative dielectric constant,  $\rho$  represents the density of space charge.

The electrical nonlinearity of rGO and PVDF under ultra-high pressure can be described by Poole-Frenkel effect, then the conductance is corrected

$$\sigma_c = \sigma_0 \exp\left[\frac{\sqrt{e^3 E / \pi \varepsilon_0 \varepsilon_r}}{kT}\right], \quad (8)$$

where  $\sigma_0$  is the original conductance,  $e$  is the electron charge,  $T$  is the thermodynamic temperature,  $\varepsilon_r$  is relative dielectric constant and  $k$  is Boltzman constant.

Apply a 150 MV m<sup>-1</sup> electric field vertically from the top to the bottom of the model while setting the bottom to the ground. The relative dielectric constant of rGO and PVDF is respectively set as 18 and 10. The original conductance of rGO and PVDF is set as 2.68 S m<sup>-1</sup> and 1 × 10<sup>-15</sup> S/m. The relative dielectric constant and conductance of BTO are set as 1400 and 1 × 10<sup>-5</sup> S/m. The polarization and current density of BTO/PVDF and BTO@rGO/PVDF nanocomposites were simulated in a three-dimensional model and the results of two-dimensional section are as shown in Fig. 1 and Fig. S1.

The FEM-based software of COMSOL version 6.0 is used for solving differential equations. The MUMPS solver and BiCGStab solver are used to completing the iteration process.
